# Supplementary material
Source: publisher figshare collection journal article supplement (https://acs.figshare.com/ndownloader/files/27841604)
Supplement: Supplementary file 1 [file 27841604]

## Supporting Information

### Enhanced performance of the Sb<sub>2</sub>Se<sub>3</sub> thin-film solar cell by an organic molecule induced crystallization and a suppression of the interface recombination

Chuan-Hui Cheng,<sup>\*†</sup> Meng Li,<sup>†</sup> Hang-Qi Song,<sup>†</sup> Wen-Hui Li,<sup>†</sup> Jing Leng,<sup>‡</sup> Wenming Tian,<sup>‡</sup> Rongrong Cui,<sup>‡</sup> Chunyi Zhao,<sup>‡</sup> Shengye Jin,<sup>‡</sup> Weifeng Liu,<sup>\*§</sup> and Shulin Cong<sup>†</sup>

<sup>†</sup>*School of Physics, Dalian University of Technology, Dalian 116024 China*

<sup>‡</sup>*State Key Laboratory of Molecular Reaction Dynamics, Dalian Institute of Chemical Physics, Chinese Academy of Sciences, Dalian 116023 China*

<sup>§</sup>*Mechanical and Electrical Engineering College, Hainan University, Haikou 570228 China*

#### Corresponding author:

\*E-mail: [chengchuanhui@dlut.edu.cn](mailto:chengchuanhui@dlut.edu.cn)

[liuwf@dlut.edu.cn](mailto:liuwf@dlut.edu.cn)

#### 1. Experiment and measurement

Sb<sub>2</sub>Se<sub>3</sub> (99.999%) were purchased from Sigma. C<sub>60</sub> (sublimed grade, ≥99.0%), Alq<sub>3</sub> (sublimed grade, ≥99.0%), and NPB (sublimed grade, ≥99.0%) were purchased from Han Feng. Solar cells were fabricated by the vacuum thermal evaporation with a base pressure of 2.0×10<sup>-4</sup> Pa on commercially patterned indium tin oxide (ITO) coated glass with a sheet resistance of ~15 Ω cm<sup>-2</sup>. Substrates were ultrasonically washed in acetone, alcohol, and deionized water in sequence, and then dried by a flow of nitrogen gas. Substrates were subsequently baked in air at 200 °C for 20 min. Next, NPB and Sb<sub>2</sub>Se<sub>3</sub> were successively deposited by vacuum thermal evaporation, and the substrate

was kept at room temperature. Then, the vacuum was broken and the substrate was transferred to a vacuum tube furnace with two temperature zones to anneal in the atmosphere of Se at 280 °C for 30 min, and was naturally cooled down to room temperature. During annealing treatment the source of Se was kept at 210 °C, and a mixture of the argon (Ar) and hydrogen (H<sub>2</sub>) gas (v:v = 10:1, 99.999%) was introduced to the tube with a flux of 30 sccm, and the pressure in the tube was ~35 Pa. After that, C<sub>60</sub> and Alq<sub>3</sub> were successively deposited by the vacuum thermal evaporation. Finally, the substrate was transferred to another chamber without breaking the vacuum, in which the Al electrode was deposited. A stainless shadow mask was used to define the device profile (1.5×5.0 mm<sup>2</sup>). The film thickness was monitored by a quartz crystal microbalance. The deposition rates were ~0.1 nm s<sup>-1</sup> for the NPB, Sb<sub>2</sub>Se<sub>3</sub>, C<sub>60</sub> and Alq<sub>3</sub>, and ~2.0 nm s<sup>-1</sup> for the Al electrode.

X-ray diffraction (XRD) was performed on a Shimadzu XRD-6100. Surface and cross-sectional images of the Sb<sub>2</sub>Se<sub>3</sub> film were measured on a Bruker scanning electron microscopy (SEM). Absorption spectra were measured on a Shimadzu UV3600 spectrophotometer. Raman spectra were obtained on a Renishaw inVia confocal Raman spectrometer with a 532 nm laser as excitation source. TA spectra (Time-Tech Spectra, Femto-TA100) were measured using previously described methods.<sup>1</sup> The full-width at half-maximum of the pump pulse was ~80 fs, and the time resolution was 50 fs. All the TA spectra were measured with a 920-nm pump pulse. The pump beam was focused to a diameter of ~300 μm. The sample was moved with a velocity of 0.3 mm s<sup>-1</sup> during the TA measurements. The current density–voltage (*J–V*) measurements were performed on a Keithley 2611A source meter. The photovoltaic response was obtained under AM1.5 illumination from a Zolix Sirius-SS150A solar simulator (class AAA) at a power of 100 mW cm<sup>-2</sup>. The illumination intensity on the cell was adjusted by a standard calibrated Si solar cell. External quantum efficiency (EQE) was measured on a Zolix SCS100 analyzer. The capacitance measurements were performed on an Agilent B1500A semiconductor device analyzer in the dark, where an alternating current voltage of 30 mV was applied.

<sup>1</sup>J. Liu, J. Leng, K. Wu, J. Zhang and S. Jin, Journal of the American Chemical Society **139**, 1432-1435 (2017).

## 2. Extraction of the device parameters from the $J$ - $V$ characteristics

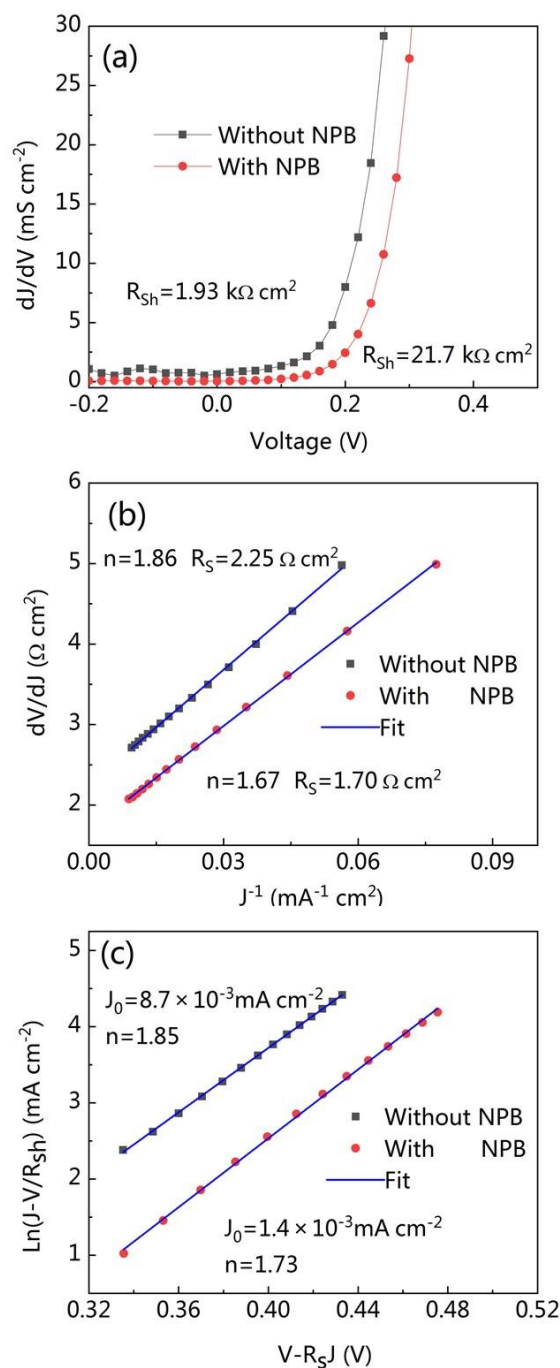

Figure S1 (a)  $dJ/dV$  vs.  $V$ , (b)  $dV/dJ$  vs.  $J^{-1}$ , and (c)  $\ln(J-V/R_{sh})$  vs.  $(V-JR_s)$  curves calculated from the  $J$ - $V$  characteristics in the dark. The points are experimental data, and the solid blue lines are the best fits in the (b) and (c).

The  $J$ - $V$  characteristics of the device can be described by

$$J = J_0 \exp\left(\frac{V - JR_s}{nk_B T}\right) + \frac{V}{R_{sh}} - J_L, \quad (2)$$

where,  $J_0$  is the reverse saturated current density,  $n$  is the ideality factor,  $k_B$  is the Boltzmann constant,  $R_s$  is the series resistance,  $R_{sh}$  is the shunt resistance,  $T$  is the absolute temperature, and  $J_L$  is the photocurrent density.  $J_L$  is equal to 0 in the dark.  $R_{sh}$  can be obtained from the flat zone on the curve of  $dJ/dV$  vs.  $V$ .  $R_s$  and  $n$  can be obtained from the intercept and the slope of the  $dV/dJ$  vs.  $J^{-1}$  curves, respectively.  $J_0$  and  $n$  can be obtained from the intercept and slope of the  $\ln(J - V/R_{sh})$  vs.  $(V - JR_s)$  curve.

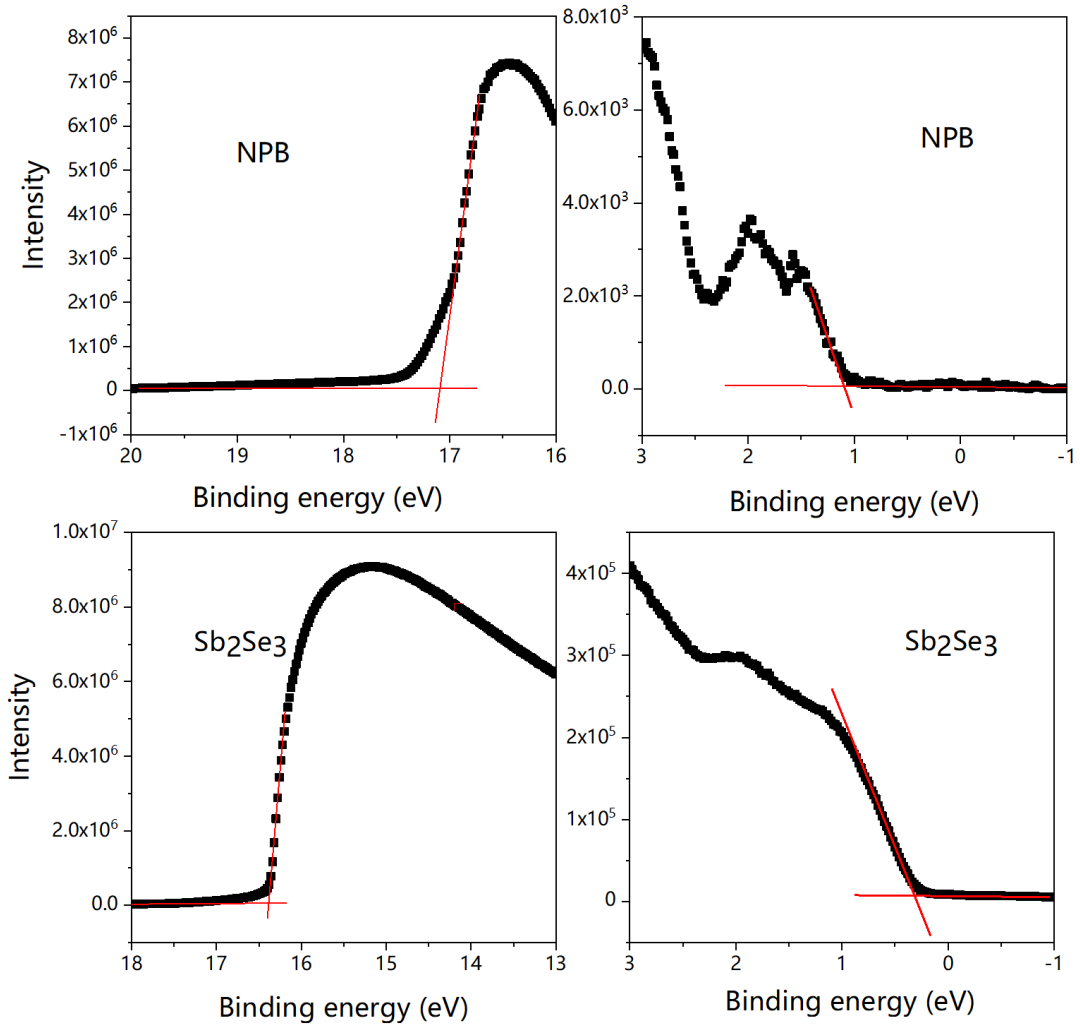

Figure S2 UPS of the NPB and Sb<sub>2</sub>Se<sub>3</sub> films.
